# Supplementary material for: Secondary nucleotide messenger c-di-GMP exerts a global control on natural product biosynthesis in streptomycetes
Source: PubMed Central journal article supplement (PMC7026642; doi:10.1093/nar/gkz1220), 2020-01-20
Supplement: gkz1220_supplemental_file.pdf [file gkz1220_supplemental_file.pdf]

## Supplementary Data

### Secondary nucleotide messenger c-di-GMP exerts a global control on natural product biosynthesis in streptomycetes

**Roman Makitrynsky<sup>1</sup>, Olga Tsypik<sup>1</sup>, Desirée Nuzzo<sup>1</sup>, Thomas Paululat<sup>2</sup>, David L. Zechel<sup>3</sup> and Andreas Bechthold<sup>1\*</sup>**

<sup>1</sup>Pharmaceutical Biology and Biotechnology, Institute of Pharmaceutical Sciences, Albert-Ludwigs University, Freiburg, Germany

<sup>2</sup>Organic Chemistry, University of Siegen, Siegen, Germany

<sup>3</sup>Department of Chemistry, Queen's University, Kingston, Ontario, Canada

\*Correspondence to Andreas Bechthold

## SUPPLEMENTARY TABLES

**Supplementary Table S1.** Strains and plasmids used in this study

| Strain / Plasmid                                                           | Characteristics                                                                                                            | Source / Reference       |
|----------------------------------------------------------------------------|----------------------------------------------------------------------------------------------------------------------------|--------------------------|
| <b>Strains</b>                                                             |                                                                                                                            |                          |
| XL1Blue                                                                    | General cloning host                                                                                                       | Agilent                  |
| ET12567 (pUZ8002)                                                          | Host used for <i>E. coli-Streptomyces</i> intergeneric conjugation, methylation deficient                                  | 1                        |
| BL21 (DE3) Star <sup>TM</sup>                                              | Host for protein production                                                                                                | Thermo Fisher Scientific |
| BW25113 (pIJ790)                                                           | Host for recombineering experiments                                                                                        | 1                        |
| <i>S. ghanaensis</i> ATCC14672                                             | Wild type (WT) moenomycin producer                                                                                         | ATCC                     |
| <i>S. ghanaensis</i> $\Delta bldA_{gh}$                                    | WT derivative, <i>bldA<sub>gh</sub></i> deletion                                                                           | 2                        |
| <i>S. ghanaensis</i> $\Delta cdgB_{gh}$                                    | WT derivative, <i>cdgB<sub>gh</sub></i> deletion                                                                           | This work                |
| <i>S. ghanaensis</i> $\Delta rmdB_{gh}$                                    | WT derivative, <i>rmdB<sub>gh</sub></i> deletion                                                                           | This work                |
| <i>S. ghanaensis</i> $\Delta bldD_{gh}$                                    | WT derivative, <i>bldD<sub>gh</sub></i> deletion                                                                           | This work                |
| <i>S. ghanaensis</i> $\Delta wblA_{gh}$                                    | WT derivative, <i>wblA<sub>gh</sub></i> deletion                                                                           | This work                |
| <i>S. ghanaensis</i> $\Delta bldD_{gh}$ $\Delta wblA_{gh}$                 | $\Delta bldD_{gh}$ derivative, <i>wblA<sub>gh</sub></i> deletion                                                           | This work                |
| <i>S. ghanaensis</i> $\Delta rmdB_{gh}$ <i>pks3</i> :: pKC <i>pks</i> -vn  | $\Delta rmdB_{gh}$ derivative, <i>pks3</i> inactivation                                                                    | This work                |
| <i>S. ghanaensis</i> $\Delta rmdB_{gh}$ <i>fkfH</i> :: pKC <i>fkfH</i> -vn | $\Delta rmdB_{gh}$ derivative, <i>fkfH</i> inactivation                                                                    | This work                |
| <i>S. albus</i> J1074                                                      | Commonly used heterologous host                                                                                            | 3                        |
| <i>S. albus</i> <i>rmdB<sub>al</sub></i> ::pKC1132                         | J1074 derivative, <i>rmdB<sub>al</sub></i> inactivation                                                                    | This work                |
| <i>Bacillus cereus</i> ATCC19637                                           | Moenomycin-sensitive test-culture                                                                                          | ATCC                     |
| <b>Plasmids</b>                                                            |                                                                                                                            |                          |
| pET28a(+)                                                                  | Cloning vector for His-tagged protein production in <i>E. coli</i> , kanamycin resistance                                  | Novagen                  |
| pET24b                                                                     | Cloning vector for His-tagged protein production in <i>E. coli</i> , kanamycin resistance                                  | Novagen                  |
| pET28a-pde                                                                 | pET28a derived plasmid for production of N-His-tagged PDE-domain of RmdB <sub>gh</sub> (cytosolic part without DGC-domain) | This work                |
| pET28a-pde-dgc                                                             | pET28a derived plasmid for production of N-His-tagged DGC-PDE-domains of RmdB <sub>gh</sub> (without transmembrane part)   | This work                |
| pET28a-dgc                                                                 | pET28a derived plasmid for production of N-His-tagged DGC-domain of RmdB <sub>gh</sub> (cytosolic part without PDE-domain) | This work                |
| pET24b-dgc-274                                                             | pET24b derived plasmid for production of C-His-tagged DGC-domain of RmdB <sub>gh</sub> (cytosolic part without PDE-domain) | This work                |
| pET24b-dgc-302                                                             | pET24b derived plasmid for production of C-His-tagged DGC-domain of RmdB <sub>gh</sub> (cytosolic part without PDE-domain) | This work                |

|                   |                                                                          |                                       |
|-------------------|--------------------------------------------------------------------------|---------------------------------------|
| pBluescript SK(-) | Vector for routine cloning                                               | Addgene                               |
| pBlcdgB           | pBlueScript carrying <i>cdgB<sub>gh</sub></i> with 2-kb flanks           | This work                             |
| pBlrmdB           | pBlueScript carrying <i>rmdB<sub>gh</sub></i> with 3-kb flanks           | This work                             |
| pBlbldD           | pBlueScript carrying <i>bldD<sub>gh</sub></i> with 3-kb flanks           | This work                             |
| pBlwblA           | pBlueScript carrying <i>wblA<sub>gh</sub></i> with 3-kb flanks           | This work                             |
| pBlcdgB::Am       | pBlcdgB carrying <i>cdgB<sub>gh</sub></i> replaced by apramycin cassette | This work                             |
| pBlrmdB::Am       | pBlrmdB carrying <i>rmdB<sub>gh</sub></i> replaced by apramycin cassette | This work                             |
| pBlbldD::Am       | pBlbldD carrying <i>bldD<sub>gh</sub></i> replaced by apramycin cassette | This work                             |
| pBlwblA::Am       | pBlwblA carrying <i>wblA<sub>gh</sub></i> replaced by apramycin cassette | This work                             |
| pLERECJ           | Carrying apramycin cassette with <i>loxP</i> -sites for gene replacement | Prof. Luzhetskyy, Saarland University |
| pKGLP2            | Suicide vector for gene replacement                                      | 4                                     |
| pKGLP2cdgB::Am    | <i>cdgB<sub>gh</sub></i> knockout construct                              | This work                             |
| pKGLP2rmdB::Am    | <i>rmdB<sub>gh</sub></i> knockout construct                              | This work                             |
| pKGLP2bldD::Am    | <i>bldD<sub>gh</sub></i> knockout construct                              | This work                             |
| pKGLP2wblA::Am    | <i>wblA<sub>gh</sub></i> knockout construct                              | This work                             |
| pUWLCre           | Carrying <i>cre</i> under <i>ermEp</i>                                   | 5                                     |
| pKC1132           | Suicide vector for gene replacement                                      | 6                                     |
| pKCrmdBal-vn      | <i>rmdBal</i> inactivation construct                                     | This work                             |
| pKCpks-vn         | <i>pks3</i> inactivation construct                                       | This work                             |
| pKCfkbH-vn        | <i>fbhH</i> inactivation construct                                       | This work                             |
| pSET152           | φC31-based integrative vector                                            | 6                                     |
| pSETcdgB          | pSET152 carrying <i>cdgB<sub>gh</sub></i>                                | This work                             |
| pSETrmdB          | pSET152 carrying <i>rmdB<sub>gh</sub></i>                                | This work                             |
| pSETbldD          | pSET152 carrying <i>bldD<sub>gh</sub></i>                                | This work                             |
| pKC1139           | <i>Streptomyces</i> oligocopy vector                                     | 7                                     |
| pKCrmdB           | pKC1139 carrying <i>rmdB<sub>gh</sub></i>                                | This work                             |
| pTES              | pSET152 carrying <i>ermEp</i>                                            | 8                                     |
| pTESacdgb         | pTES carrying <i>cdgB<sub>gh</sub></i>                                   | This work                             |
| pTESabldD-expI    | pTES carrying <i>bldD<sub>gh</sub></i>                                   | This work                             |
| pGUS              | Promoter probe vector                                                    | 4                                     |
| padpAscript       | pGUS, <i>adpA<sub>gh</sub>p-gusA</i> fusion                              | 2                                     |
| pmoeE5script      | pGUS, <i>moeE5p-gusA</i> fusion                                          | 2                                     |
| pblldAscript      | pGUS, <i>bldA<sub>gh</sub>p-gusA</i> fusion                              | 2                                     |
| prmdBscript       | pGUS, <i>rmdA<sub>gh</sub>p-gusA</i> fusion                              | This work                             |
| pGUSHL4aadA       | pTES-derivative for translational fusion experiments                     | 4                                     |
| prmdBtransl       | pGUSHL4aadA, <i>rmdB<sub>gh</sub>-gusA</i> fusion                        | This work                             |
| pSETrmdB-CTG      | pSETrmdB, TTA→CTG substitution                                           | This work                             |
| prmdB-CTGtransl   | pGUSHL4aadA, <i>rmdB<sub>gh</sub>(TTA→CTG)-gusA</i>                      | This work                             |

|                  |                                                                                   |           |
|------------------|-----------------------------------------------------------------------------------|-----------|
|                  | fusion                                                                            |           |
| prmdBcontr       | pGUSHL4aadA, promoterless <i>rmdB<sub>gh</sub></i> - <i>gusA</i> fusion           | This work |
| prmdB-CTGcontrol | pGUSHL4aadA, promoterless <i>rmdB<sub>gh</sub></i> (TTA→CTG) - <i>gusA</i> fusion | This work |
| pIJ10257         | φBT1-based integrative vector                                                     | 9         |
| pIJ10350         | pIJ10257 carrying <i>cdgB<sub>sco</sub></i> under <i>ermEp</i> control            | 10        |

**Supplementary Table S2.** Oligonucleotides used in this study

| Primer name     | Sequence                                                        | Purpose                                                                                                                    |
|-----------------|-----------------------------------------------------------------|----------------------------------------------------------------------------------------------------------------------------|
| cdgB_for        | GTGGTCACCCCAGCTCCAG                                             | <i>cdgB<sub>gh</sub></i> gene deletion                                                                                     |
| cdgB_rev        | CTCCCACGAGCCGCTG                                                |                                                                                                                            |
| rmdB_for        | aaatctagaGACAACACCTTCAACGACGAC                                  | <i>rmdB<sub>gh</sub></i> gene deletion                                                                                     |
| rmdB_rev        | aaagaattcCGGTGAAACTTCCCTCTCAG                                   |                                                                                                                            |
| bldD-hz-f       | AGAAGAGGTTGACCACGGTC                                            | <i>bldD<sub>gh</sub></i> gene deletion                                                                                     |
| bldD-hz-r       | GTCGAGCTGACCGTCCAG                                              |                                                                                                                            |
| wblA_for        | aaatctagaCGTTGCCCTGGACCACG                                      | <i>wblA<sub>gh</sub></i> gene deletion                                                                                     |
| wblA_rev        | aaagatataCCGAGGAGTACGCCGAGC                                     |                                                                                                                            |
| cdgB_kn_for     | CTTGATTCACTCCGAGGTCTCGGGGGGAGG<br>GCGAGGATGGATATCTCTAGATACCG    | Apramycin cassette for<br><i>cdgB<sub>gh</sub></i> replacement                                                             |
| cdgB_kn_rev     | CTTGACCTGCGGTTACCCCGCATGCGACCC<br>GCCGTTCAAACAAAAGCTGGAGCTC     |                                                                                                                            |
| rmdB_kn_for     | CGCGTGGCGTGGGCACCGCCGGCTGTGAGA<br>GGGACGGGAATGGATATCTCTAGATACCG | Apramycin cassette for<br><i>rmdB<sub>gh</sub></i> replacement                                                             |
| rmdB_kn_rev     | CGCCGACGGCGGACCCACGGTGTCCGCCT<br>CCGGGGCGTCAAACAAAAGCTGGAGCTC   |                                                                                                                            |
| bldD_kn_for     | AACCCAACCAGCCGCGTCGACACAGTGCCG<br>GGGAGCCATATGGATATCTCTAGATACCG | Apramycin cassette for<br><i>bldD<sub>gh</sub></i> replacement                                                             |
| bldD_kn_rev     | GCGGTACGTTTCTGCTCGACCCGCGGAAGG<br>CCGTGCGCTCAAACAAAAGCTGGAGCTC  |                                                                                                                            |
| wblA_kn_for     | TTCGTTCAAGGAGCAGCGCAGAACAGGGCC<br>AAGGCGGTGGGATATCTCTAGATACCG   | Apramycin cassette for<br><i>wblA<sub>gh</sub></i> replacement                                                             |
| wblA_kn_rev     | GACCCCGCGGGTGACCGAGGACCCCTGAG<br>GAACCCTCAAACAAAAGCTGGAGCTC     |                                                                                                                            |
| xnr_1338_vn1_f  | aaatctagaCCTCGACGAGGCCGAACAG                                    | <i>XNR_1338</i> disruption                                                                                                 |
| xnr_1338_vn1_r  | aaagatataTCCAGCCCGGCGACGTG                                      |                                                                                                                            |
| xnr1338_check   | CGACTCCACTCTCTGGATCG                                            | Confirmation of<br><i>XNR_1338</i> disruption                                                                              |
| rmdB_EAL_for    | GCCGGCACCGGCTACTCCTCC                                           | <i>pks3</i> disruption                                                                                                     |
| pks_vn_for      | aaatctagaCTGGTGCATCCACCTG                                       |                                                                                                                            |
| pks_vn_rev      | aaagatataGGAAGACGAACCCGTCCTG                                    |                                                                                                                            |
| fkbH_RT_for     | aaatctagaCCGAACGGCTCAACTTCG                                     | <i>fkbH</i> disruption                                                                                                     |
| fkbH_RT_rev     | aaagatataGTCGCCAGCAACTTGAGGTG                                   |                                                                                                                            |
| cdgB_compl_for  | aaatctagaTCCAGGGAGACCGACAG                                      | $\Delta$ <i>cdgB<sub>gh</sub></i><br>complementation /<br>mutant confirmation                                              |
| cdgB_compl_rev  | aaagaattcTAGGTGCGGATCGAATG                                      |                                                                                                                            |
| rmdB_compl_for  | aaatctagaTCGAAGAAGACGTCGTTTCG                                   | $\Delta$ <i>rmdB<sub>gh</sub></i><br>complementation /<br><i>rmdB<sub>gh</sub></i> overexpression<br>/ mutant confirmation |
| rmdB_exp_for    | aaatctagaCTGAGGGTTGTCGGGCATC                                    |                                                                                                                            |
| rmdB_exp_rev    | aaagaattcGGGTGAGTGTGAGTGGTTTGG                                  |                                                                                                                            |
| bldD_compl_for  | aaatctagaCGTTCGACGATCTCGTG                                      | $\Delta$ <i>bldD<sub>gh</sub></i><br>complementation /<br>mutant confirmation                                              |
| bldD_compl_rev  | aaagaattcGGTACGTTTCTGCTCGACC                                    |                                                                                                                            |
| cdgB_exp_for    | aaaggtaccATCACTCCGAGGTCTCG                                      | <i>cdgB<sub>gh</sub></i> overexpression                                                                                    |
| cdgB_exp_rev    | aaagatataATCCTTCCCTTGACCTGC                                     |                                                                                                                            |
| bldD_exp_for1   | aaaggtaccGCGTCGACACAGTGCC                                       | <i>bldD<sub>gh</sub></i> overexpression                                                                                    |
| bldD_exp_rev    | aaagatataGGTACGTTTCTGCTCGACC                                    |                                                                                                                            |
| rmdB_script_rev | aaaggtaccGCCACGCGGCCCGATG                                       | <i>rmdB<sub>gh</sub></i> promoter                                                                                          |

|                        |                                        |                                                                             |
|------------------------|----------------------------------------|-----------------------------------------------------------------------------|
| rmdB_compl_for         | aaatctagaTCGAAGAAGACGTCGTTTCG          | amplification /<br>stopcodon-free <i>rmdB<sub>gh</sub></i><br>amplification |
| rmdB_transl_rev        | aaagatataGCCGACCCGCCCGTG               |                                                                             |
| rmdB_contr_for         | aaatctagaTGGGCACCGCCGGCTG              | Promoterless <i>rmdB<sub>gh</sub></i><br>amplification                      |
| rmdB_CTG_for           | CTGCTGCCGGTCGCCGACTC                   | <i>rmdB<sub>gh</sub></i> TTA→CTG<br>direct mutagenesis                      |
| rmdB_CTG_rev           | GACGGCGAACTCGTCG                       |                                                                             |
| wblA_check_rev         | aaagaattcCACACGTGACCGCTTCAC            | Δ <i>wblA<sub>gh</sub></i> mutant<br>confirmation/ RT-PCR<br>primers        |
| wblA_RT_for            | CCTCGATTCTGGGAGAGGAC                   |                                                                             |
| wblA_RT_rev            | CGGTCTCCAGCAGCCTG                      | <i>wblA<sub>gh</sub></i> RT-PCR<br>primers                                  |
| desA_vn_for            | CACCCAGTCCAACCTCCAG                    | <i>desaA</i> RT-PCR<br>primers                                              |
| desA_vn_rev            | AGCGTCATCCACAGCTTGAG                   |                                                                             |
| desE_vn_for            | CGAGTCCTCGAAGGACAAG                    | <i>desaE</i> RT-PCR<br>primers                                              |
| desE_vn_rev            | GTGCCAGAGACGTAGAAGATC                  |                                                                             |
| moeE5_RT_for           | CATCTCGACGGTCTTCCAC                    | <i>moeE5</i> RT-PCR<br>primers                                              |
| moeE5_RT_rev           | ATGGAGACCACTTCGTTGAC                   |                                                                             |
| moeO5_RT_for           | GGAAGAGCTTCTCGAGAC                     | <i>moeO5</i> RT-PCR<br>primers                                              |
| moeO5_RT_rev           | CTGTCGAGGTAAGTTCGTTGA                  |                                                                             |
| moeGT5_RT_for          | CTGGACGGACGACGACATC                    | <i>moeGT5</i> RT-PCR<br>primers                                             |
| moeGT5_RT_rev          | CAGAACCAGGTGAAGTGCAG                   |                                                                             |
| adpA_RT_for            | GCTCGATCACCTCACCAC                     | <i>adpA<sub>gh</sub></i> RT-PCR<br>primers                                  |
| adpA_RT_rev            | AGCGTCTCCACGTCGAAC                     |                                                                             |
| hrdB_gh_for            | CGACTACACCAAGGGCTACAA                  | <i>hrdB<sub>gh</sub></i> RT-PCR<br>primers                                  |
| hrdB_gh_rev            | TGGTCTTGGACTCGATCTGG                   |                                                                             |
| cdgB_EMSA_for          | TCCAGGGAGACCGACAG                      | <i>cdgB<sub>ghp</sub></i> EMSA<br>primers                                   |
| cdgB_EMSA_rev          | CGAGACCTCGGAGTGAATC                    |                                                                             |
| rmdB_EMSA_for          | TCGAAGAAGACGTCGTTTCG                   | <i>rmdB<sub>ghp</sub></i> EMSA<br>primers                                   |
| rmdB_EMSA_rev          | GCCACGCGGCCCGATG                       |                                                                             |
| wblA_EMSA_fl           | GGGCCACGTATCAATACGTCC                  | <i>wblA<sub>ghp</sub></i> EMSA<br>primers                                   |
| wblA_EMSA_rev          | TTCATCCGGATCGGTAGTGC                   |                                                                             |
| BldD-NdeI              | AATTAACATATGTCCAGCGAATACGCCAAA<br>C    | Production of His-<br>tagged BldD                                           |
| BldD-XhoI              | AAACTCGAGTCAGCTCTCCTCGTGGGAGG          |                                                                             |
| YdeH-NcoI              | AAACCATGGCTATCAAGAAGACAACGGAA          | Production of His-<br>tagged YdeH                                           |
| YdeH-XhoI              | TATCTCGAGAACTCGGTTAATCACGTTTT          |                                                                             |
| EAL_for                | AAAAAACATATGGGCCTCACCTCGTCCTG          | Production of His-<br>tagged PDE                                            |
| EAL_rev                | AAACTCGAGTCAGCCGACCCGCCCG              |                                                                             |
| GGDEF_for              | AAAAAACATATGCAGCTGCGCGACCCGCTG         | Production of His-<br>tagged DGC                                            |
| DGC-274                | AATTAACATATGGCCCTGCTCGGCATAGC          |                                                                             |
| DGC-302                | AATTAACATATGGCCCTGGACTCCACCCTG         |                                                                             |
| GGDEF_rev              | AAACTCGAGTCAGTTGGAGTCGCGCTTGGAC<br>CTC |                                                                             |
| GGDEF_for /<br>EAL_rev | See above                              |                                                                             |
|                        |                                        | Production of His-<br>tagged DGC-PDE                                        |

**Supplementary Table S3.** C-di-GMP turnover proteins encoded by *S. ghanaensis*

| Gene                                           | Protein domain architecture | Orthologues                      |
|------------------------------------------------|-----------------------------|----------------------------------|
| <i>ssfg_00725</i>                              | PAS-PAC-GGDEF-EAL           | <i>rmdA</i> , <i>sven6830</i>    |
| <i>ssfg_02181</i>                              | 9 TM-PAS-GGDEF-EAL          | <i>sco5511</i> , <i>sven5187</i> |
| <i>ssfg_02196</i> ( <i>rmdB<sub>gh</sub></i> ) | 6 TM-GGDEF-EAL              | <i>rmdB</i> , <i>sven5165</i>    |
| <i>ssfg_02343</i>                              | GGDEF                       | <i>sco5345</i> , <i>sven3999</i> |
| <i>ssfg_02459</i>                              | 5 TM-HD-GYP                 | <i>sven4873</i>                  |
| <i>ssfg_02460</i>                              | 2 TM-HD-GYP *               | <i>sven4872</i>                  |
| <i>ssfg_02707</i>                              | GAF-GGDEF                   | <i>sco4931</i> , <i>sven4602</i> |
| <i>ssfg_03956</i> ( <i>cdgB<sub>gh</sub></i> ) | GAF-PAS-PAC-GGDEF           | <i>cdgB</i> , <i>sven4034</i>    |
| <i>ssfg_04551</i>                              | PAS-GGDEF-EAL               | <i>cdgA</i> , <i>sven2604</i>    |

PAS/PAC/GAF-signal domains, GGDEF-cyclic diguanylate cyclase domain, TM-transmembrane domain, EAL/GYP- diguanylate phosphodiesterase domains.

\* The entire domain architecture cannot be predicted due to the incomplete genome sequence; partial in the middle of a contig; missing start

**Supplementary Table S4.** Putative biosynthetic gene clusters encoded by the *S. ghanaensis* genome identified with antiSMASH (ver. 5.0.0beta1-d4ff879)

| <b>№</b>                                            | <b>Type</b>                       | <b>From, bp</b> | <b>To, bp</b> | <b>Most similar known cluster</b> | <b>Similarity</b> |
|-----------------------------------------------------|-----------------------------------|-----------------|---------------|-----------------------------------|-------------------|
| The following regions are from record NZ_DS999641.1 |                                   |                 |               |                                   |                   |
| 1                                                   | T1PKS                             | 63,385          | 149,131       | Bafilomycin, t1pks                | 88%               |
| 2                                                   | T3PKS                             | 177,249         | 217,834       | Alkylresorcinol, t3pks            | 100%              |
| 3                                                   | NRPS                              | 262,340         | 319,857       | Stenothricin, NRPS                | 13%               |
| 4                                                   | bacteriocin                       | 582,746         | 590,945       | Informatipeptin, lanthipeptide    | 28%               |
| 5                                                   | NRPS                              | 803,107         | 868,453       | Laspartomycin, NRPS               | 20%               |
| 6                                                   | terpene                           | 987,917         | 1,012,309     | Hopene, terpene                   | 84%               |
| 7                                                   | phosphoglycolipid                 | 1,397,592       | 1,425,782     | Teichomycin, other                | 77%               |
| 8                                                   | siderophore                       | 1,522,750       | 1,532,083     |                                   |                   |
| 9                                                   | terpene                           | 1,534,488       | 1,554,917     |                                   |                   |
| 10                                                  | ladderane, arylpolyene, NRPS      | 1,555,405       | 1,674,468     | Skyllamycin, NRPS                 | 48%               |
| 11                                                  | terpene                           | 1,772,312       | 1,791,540     | Geosmin, terpene                  | 100%              |
| 12                                                  | bacteriocin                       | 1,811,766       | 1,822,674     |                                   |                   |
| 13                                                  | T1PKS                             | 1,827,870       | 1,875,244     | Enduracidin, NRPS                 | 29%               |
| 14                                                  | siderophore                       | 2,146,205       | 2,157,801     |                                   |                   |
| 15                                                  | terpene                           | 2,717,248       | 2,736,624     | Albaflavenone, terpene            | 100%              |
| 16                                                  | siderophore                       | 4,982,725       | 4,994,497     | Desferrioxamine, other            | 66%               |
| 17                                                  | melanin                           | 5,060,112       | 5,070,567     | Melanin, other                    | 100%              |
| 18                                                  | lassopeptide                      | 5,557,477       | 5,579,934     |                                   |                   |
| 19                                                  | ectoine                           | 6,039,673       | 6,050,071     | Ectoine, other                    | 100%              |
| 20                                                  | NRPS,T2PKS                        | 6,867,521       | 6,981,858     | Spore pigment, t2pks              | 66%               |
| 21                                                  | terpene                           | 7,189,411       | 7,214,649     | Carotenoid, terpene               | 54%               |
| 22                                                  | lanthipeptide                     | 7,266,431       | 7,289,088     | SapB, lanthipeptide               | 75%               |
| 23                                                  | NRPS,amglyccycl                   | 7,483,579       | 7,534,897     | Guadinomine, nrps-t1pks           | 7%                |
| 24                                                  | T3PKS,fused                       | 7,647,895       | 7,688,893     | Pheganomycin, nrps-ripp           | 47%               |
| 25                                                  | NRPS-like,furan                   | 7,745,399       | 7,788,860     | Elaiophylin, t1pks                | 20%               |
| 26                                                  | bacteriocin                       | 7,882,687       | 7,894,588     |                                   |                   |
| 27                                                  | hgIE-KS                           | 7,916,828       | 7,965,229     | Esmeraldin, other                 | 8%                |
| The following regions are from record NZ_DS999642.1 |                                   |                 |               |                                   |                   |
| 28                                                  | other, NRPS, T1PKS, butyrolactone | 3,189           | 102,884       | C-1027, polyketide                | 62%               |
| 29                                                  | other, T1PKS, NRPS                | 168,304         | 231,283       | Merochlorin, t3pks-terpene        | 19%               |



## SUPPLEMENTARY FIGURES

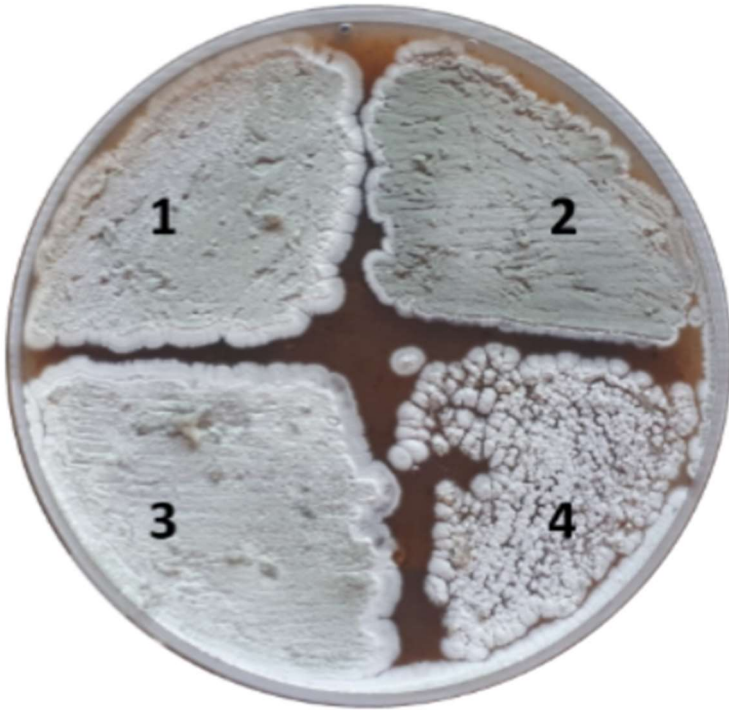

**Supplementary figure S1.** *S. ghanaensis*  $\Delta cdgB_{gh}$  (2) displays precocious onset into sporogenesis compared to the wild type strain (1). Overexpression of *cdgB\_{gh}* (4) blocked development at aerial mycelium level compared to a strain bearing an empty vector (3). Strains were grown for 4 days on the oatmeal agar medium.

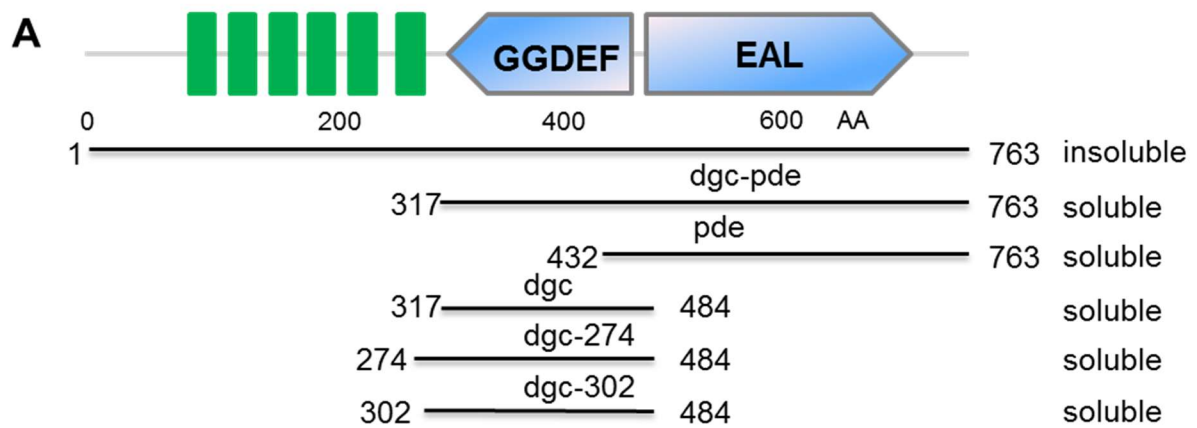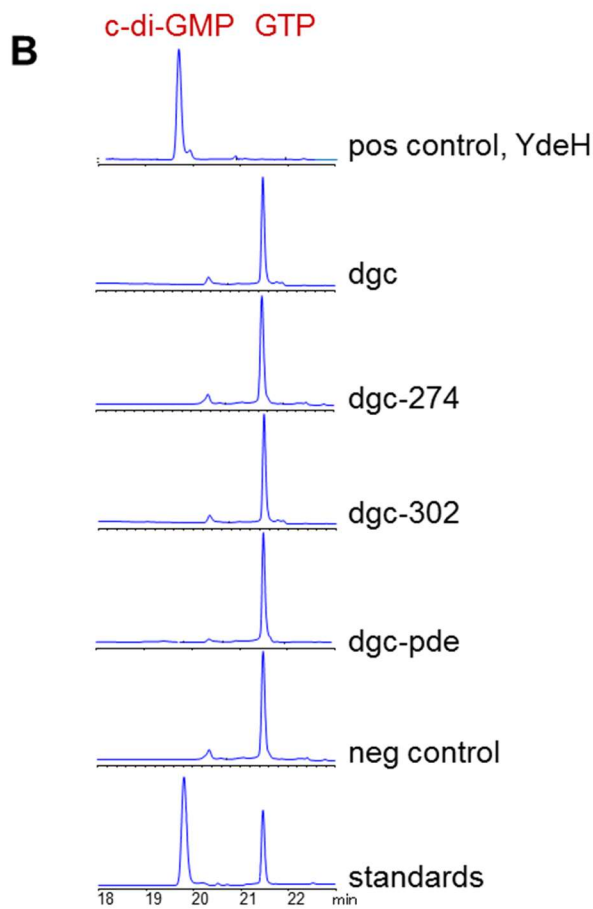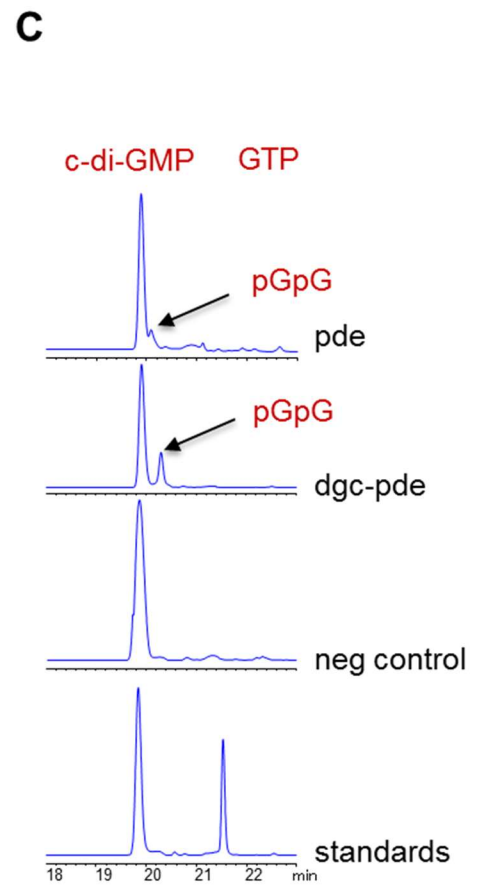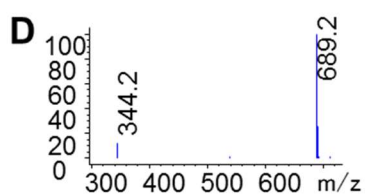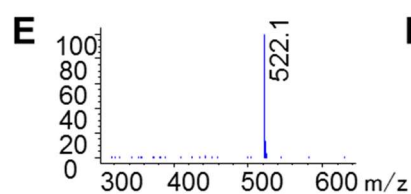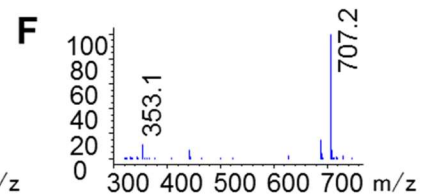

**Supplementary figure S2.** *In vitro* enzymatic assays with differently truncated versions of RmdB<sub>gh</sub> revealed only PDE activity. (A) General scheme of the differently truncated RmdB<sub>gh</sub> production. (B) HPLC chromatograms of *in vitro* reactions to test DGC activity. (C) HPLC chromatograms of *in vitro* reactions to test PDE activity. MS spectra of peaks (negative mode) corresponding to c-di-GMP (D), GTP (E) and pGpG (F).

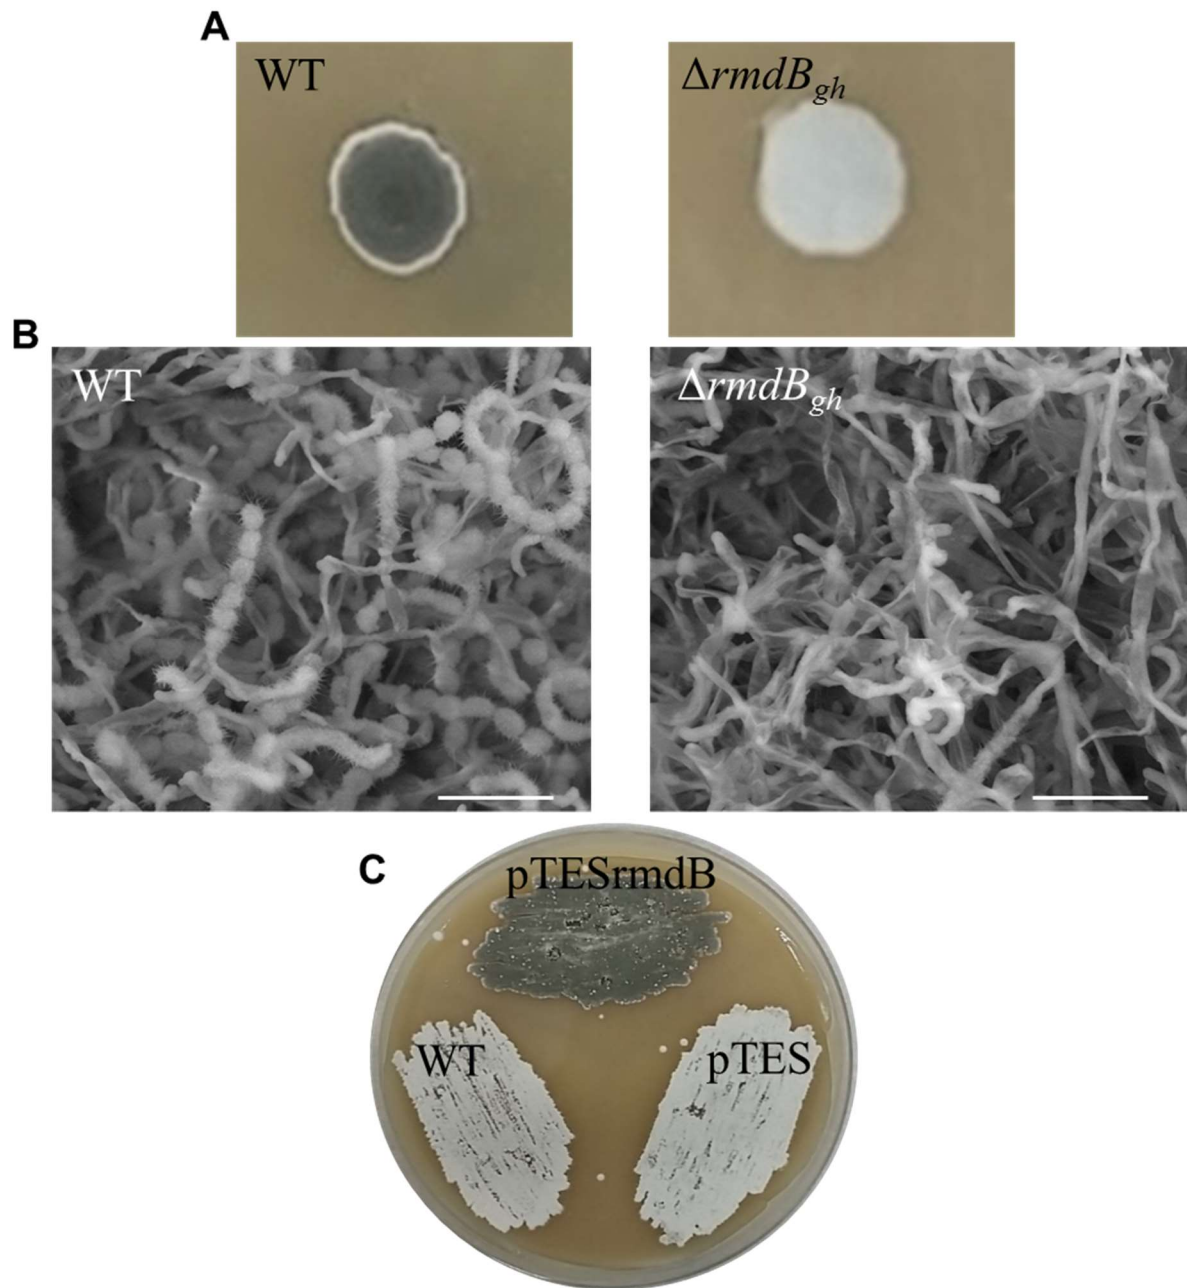

**Supplementary figure S3.** RmdB<sub>gh</sub> activity is crucial for normal morphogenesis. Sporulation is impaired in the *S. ghanaensis*  $\Delta rmdB_{gh}$  mutant. **(A)** Colonies of *S. ghanaensis* strains were grown on the SFM medium for 5 days. **(B)** Surfaces of the colonies from **a** were used to obtain SEM images. Scale bars are 5  $\mu$ m. **(C)** Extra copies of *rmdB<sub>gh</sub>* enhances sporulation in *S. ghanaensis* grown on SFM for 43 hours.

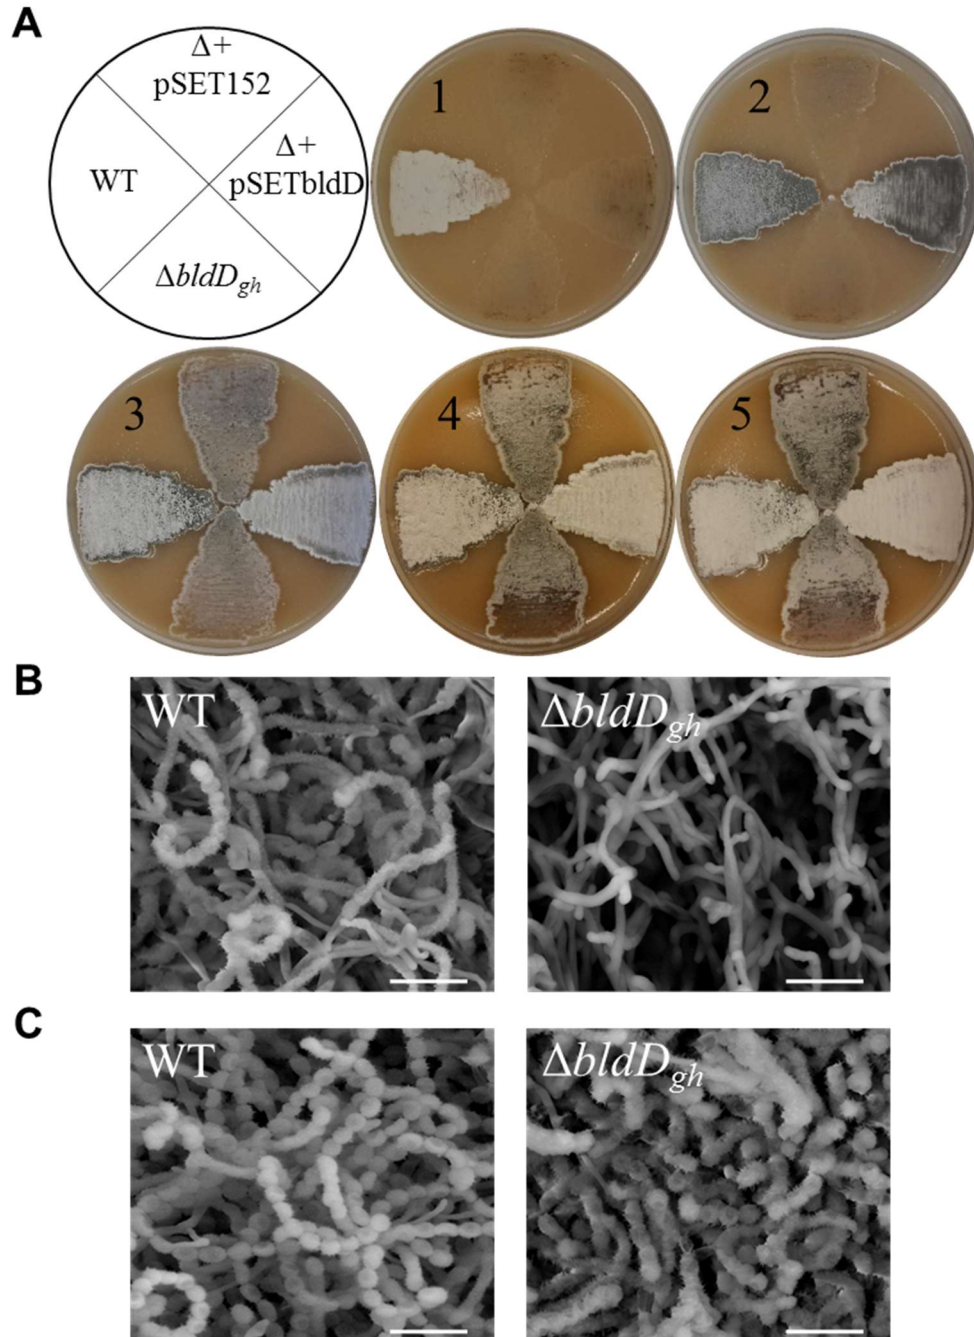

**Supplementary figure S4.** BldD<sub>gh</sub> controls the timing of morphological development. (A) Lawns of *S. ghanaensis* strains grown over the time course. Strains were cultivated on SFM for 5 days. Pictures were captured each 24 hours. Surfaces of the lawns from A were used to obtain SEM images. (B) SEM pictures taken on the second day. (C) SEM pictures taken on the fifth day. Scale bars are 5  $\mu$ m (B and C).

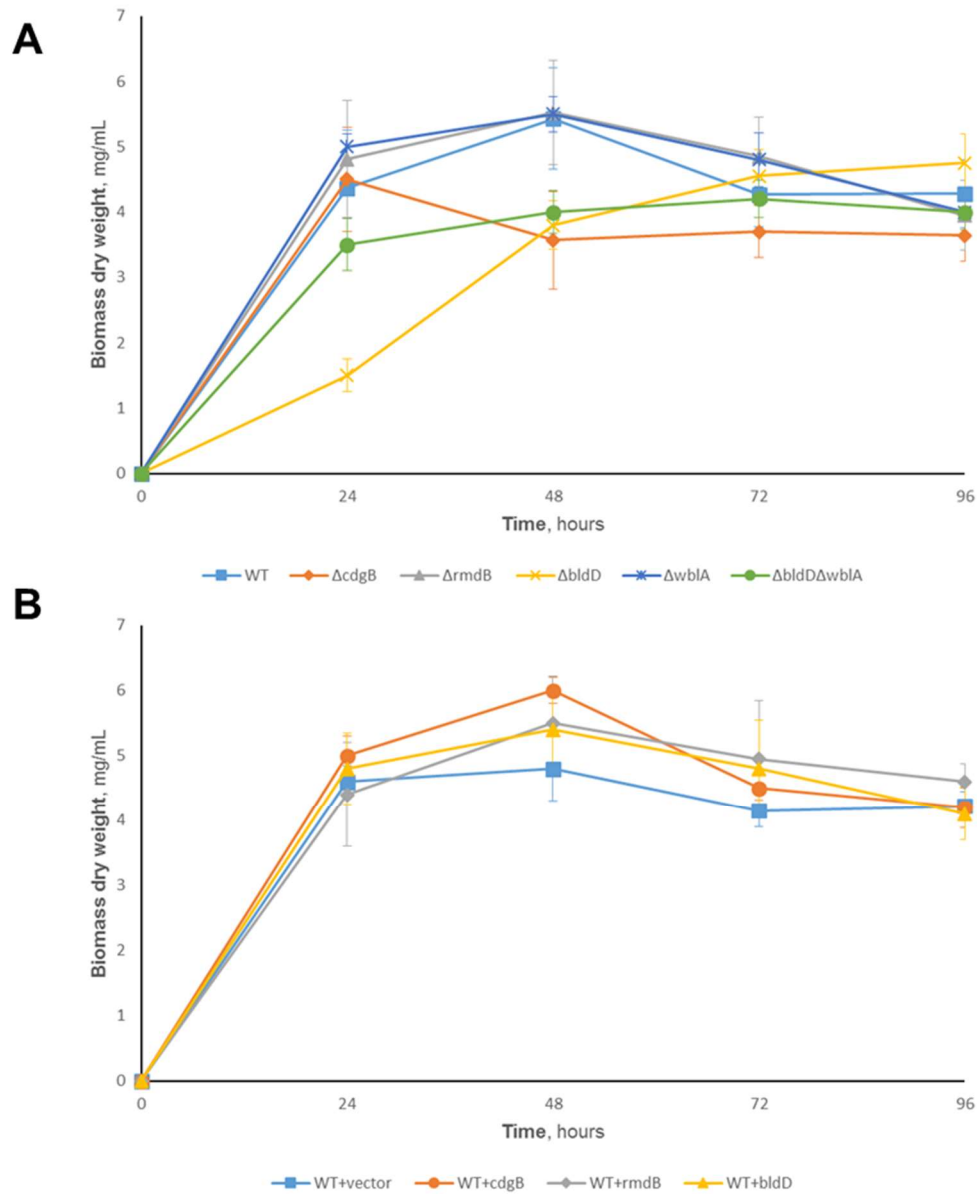

**Supplementary figure S5.** Growth curves of *S. ghanaensis* strains with gene deletions (**A**) and overexpressions (**B**) studied in this work. The experiment was essentially performed as described before<sup>11</sup>. The experiment was done twice in three replicates each time. Error bars,  $\pm 2$  SD.



**A**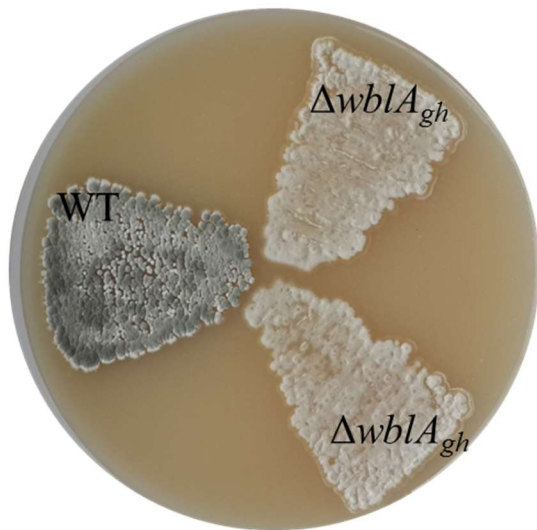**B**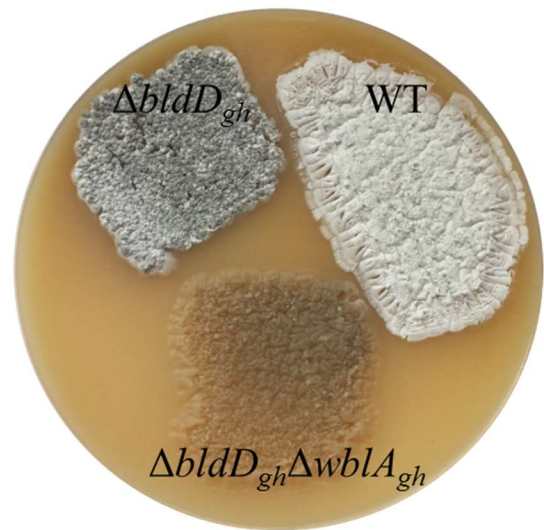

**Supplementary figure S6.** (A) *S. ghanaensis*  $\Delta wblA_{gh}$  mutant displayed “white” phenotype due to inability to form mature spores. Strains were grown on SFM medium for 3 days. (B) Deletion of  $wblA_{gh}$  from the *S. ghanaensis*  $\Delta bldD_{gh}$  chromosome strongly impaired morphological development. Strains were grown on SFM medium for 5 days.

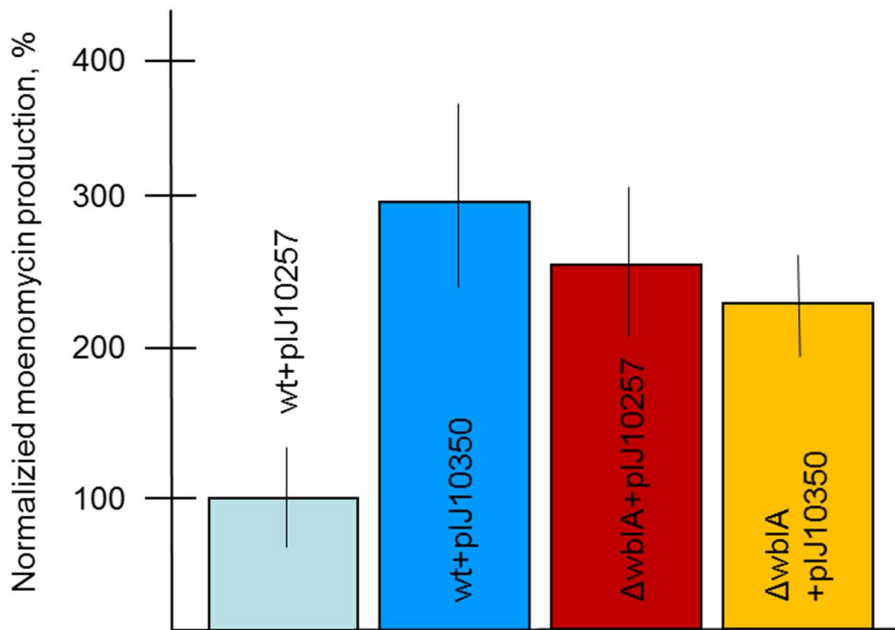

**Supplementary figure S7.** Levels of moenomycin production by various *S. ghanaensis* strains as determined by HPLC-MS. The mean value of moenomycin mass peak area in *S. ghanaensis* ATCC14672 was taken as 100%. Amounts of moenomycin were normalized to equal amounts of biomass (dry weight) and are the mean value from at least three independent biological replicates. Error bars,  $\pm 2$  SD.

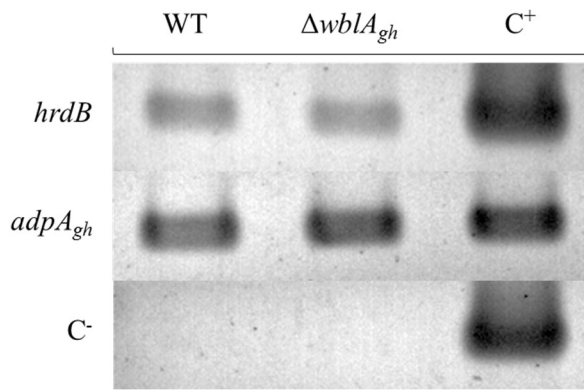

**Supplementary figure S8.** Deletion of *wblA<sub>gh</sub>* does not influence expression of *adpA<sub>gh</sub>*. Comparison of  $\Delta wblA_{gh}$  and *S. ghanaensis* ATCC14672 transcriptional profiles. The expression of tested genes was analyzed in 48 h cultures grown in TSB; 200 ng of RNA sample were used per reaction; C<sup>+</sup>, positive control (genomic DNA of ATCC14672 strain). Attempts to synthesize *hrdB* from RNA without pretreatment with RT served as negative controls (marked as C<sup>-</sup>). Total RNA samples were isolated from three independent biological replicates. The images represent the typical result of three independent RT-PCR experiments.



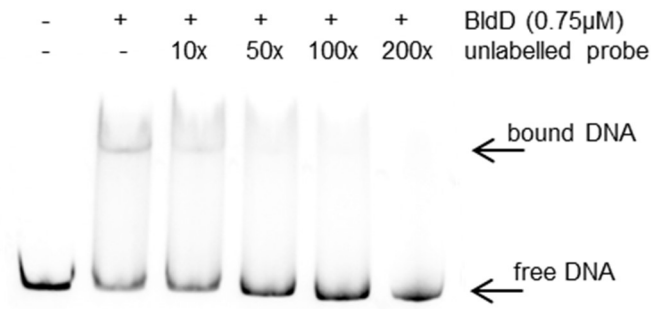

**Supplementary figure S9.** EMSA competition assay of BldD<sub>gh</sub> with *wblA<sub>ghp</sub>*. The reaction was carried out with 0.75 μM of purified BldD<sub>gh</sub>, 1.5 μM c-di-GMP, 20 fmol of <sup>33</sup>P-labeled *wblA<sub>ghp</sub>* and increasing concentrations of unlabelled probe (10-, 50-, 100- and 200-fold molar excess to labelled probe).

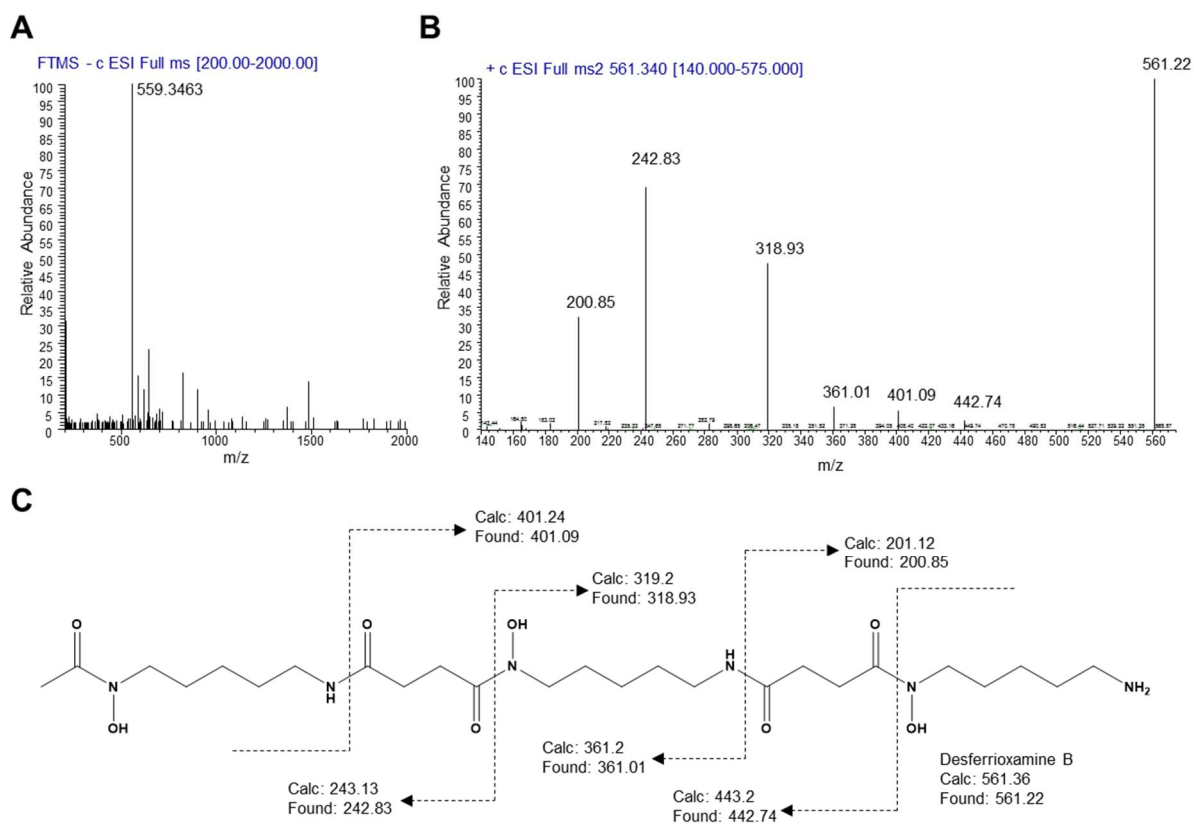

**Supplementary figure S10.** (A) HRMS spectrum of desferrioxamine B. (B) ESI-MS/MS fragmentation pattern of desferrioxamine B. (C) Proposed ESI-MS/MS fragmentation of desferrioxamine B.

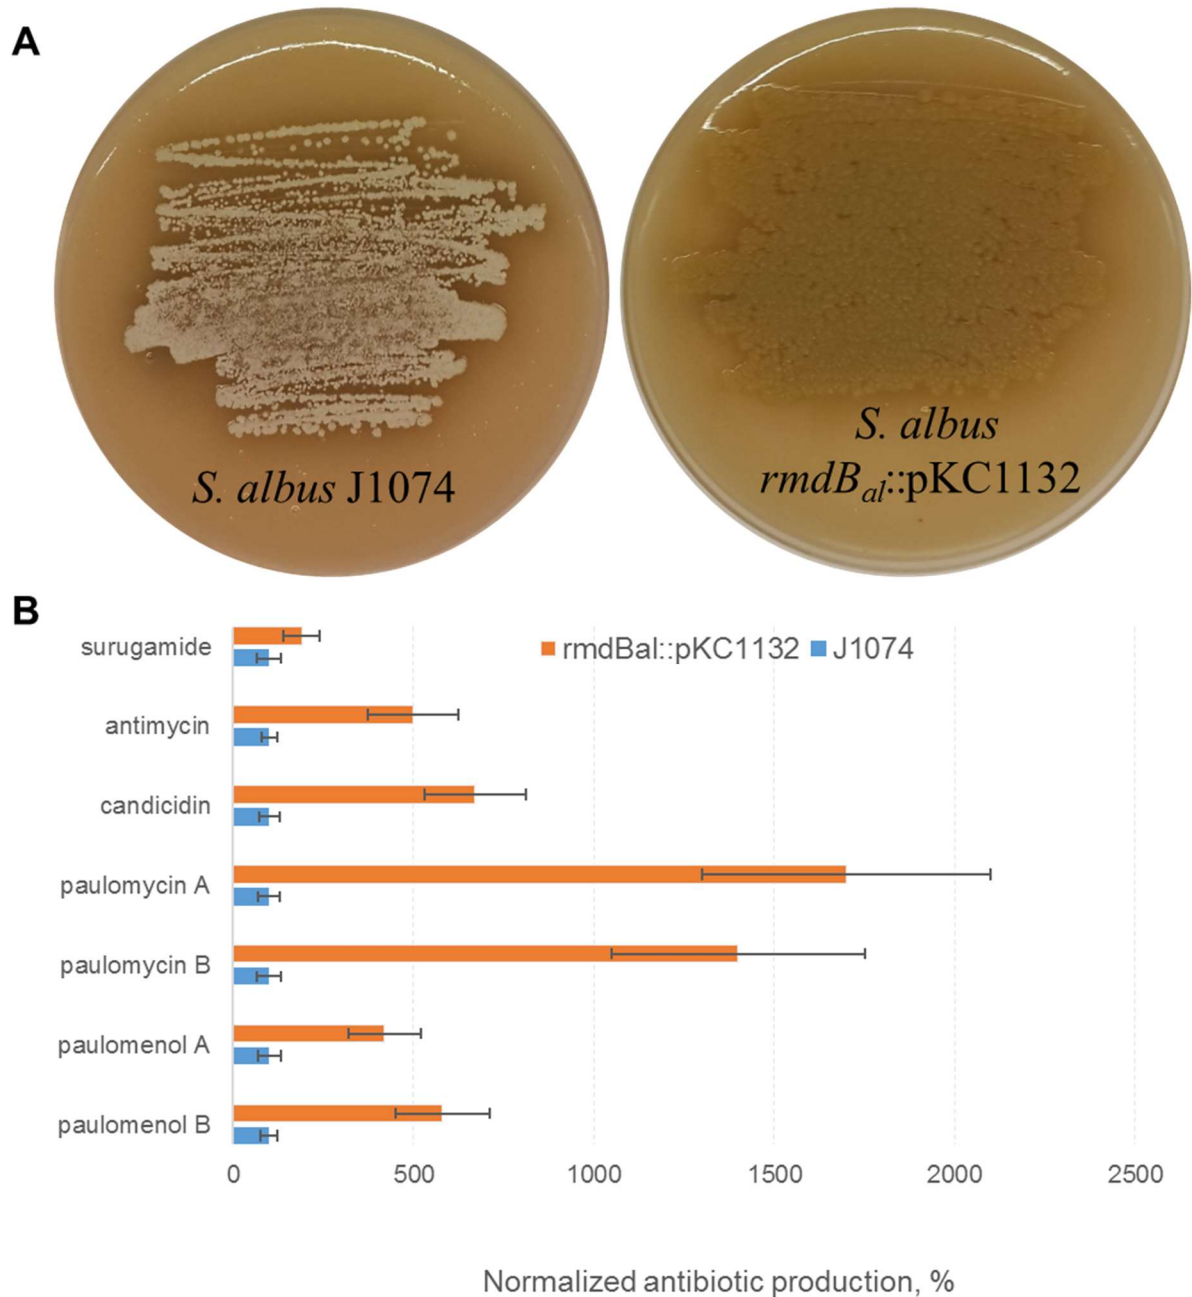

**Supplementary figure S11.** Inactivation of *rmdBal* in the *S. albus* chromosome strongly affected morphological development and SM production. **(A)** Morphology of strains grown on SFM medium for 4 days. **(B)** Comparison of antibiotic production titers by the *S. albus* strains as determined by HPLC-MS. The mean value of antibiotic mass peak area in *S. albus* J1074 was taken as 100%. Amounts of compounds were normalized to equal amounts of biomass (dry weight) and are mean values from at least three independent biological replicates. Error bars,  $\pm 2$  SD.

**Supplementary Note 1.** List of abbreviations and acronyms used in the work.

|                    |                                                                                                   |
|--------------------|---------------------------------------------------------------------------------------------------|
| (sq)RT-PCR         | semiquantitative reverse transcription polymerase chain reaction                                  |
| <i>aac(3)IV</i>    | apramycin resistance gene                                                                         |
| antiSMASH          | “annotation and analysis of secondary metabolite biosynthesis gene clusters” tool                 |
| BGC                | biosynthetic gene cluster                                                                         |
| <i>bld</i>         | “bald” genes responsible for aerial mycelium formation                                            |
| BldDBs             | conservative BldD-binding site                                                                    |
| <i>cdg</i>         | cyclic dimeric GMP genes                                                                          |
| cfu                | colony-forming unit                                                                               |
| Cre                | Cre recombinase                                                                                   |
| CSR                | cluster situated regulator                                                                        |
| DGC                | diguanylate cyclases                                                                              |
| EMSA               | electrophoretic mobility shift assay                                                              |
| <i>ermEp</i>       | strong constitutive promoter of <i>ermE</i> gene from the erythromycin BGC                        |
| ESI                | electrospray ionization                                                                           |
| FIMO               | “Find Individual Motif Occurrences” software                                                      |
| GusA               | reporter system based on $\beta$ -glucuronidase activity                                          |
| HPLC               | High Performance Liquid Chromatography                                                            |
| HRMS               | High Resolution Mass Spectrometry                                                                 |
| <i>hyg</i>         | hygromycin resistance gene                                                                        |
| LC–MS              | liquid chromatography–mass spectrometry                                                           |
| <i>loxP</i>        | recognition site for Cre recombinase                                                              |
| MEME               | “Multiple Em for Motif Elicitation” software                                                      |
| MmA                | moenomycin A                                                                                      |
| <i>moe</i> cluster | moenomycin A biosynthetic gene cluster                                                            |
| MS/MS              | tandem mass spectrometry                                                                          |
| NMR                | nuclear magnetic resonance                                                                        |
| PDE                | phosphodiesterase                                                                                 |
| pGpG               | 5'-phosphoguanlylyl-(3'→5')-guanosine                                                             |
| PKS                | polyketide synthase                                                                               |
| PVDF               | polyvinylidene difluoride                                                                         |
| REDIRECT           | gene replacement system, based on $\lambda$ RED ( <i>gam</i> , <i>bet</i> , <i>exo</i> ) function |
| <i>rmd</i>         | regulator of morphology and development genes                                                     |
| SEM                | scanning electron microscopy                                                                      |
| SM                 | secondary metabolite                                                                              |
| UHPLC              | Ultra-High Performance Liquid Chromatography                                                      |
| <i>whi</i>         | “white” genes responsible for sporogenesis                                                        |

**Supplementary Note 2.** Chemical characterization data for oxohygroolidin.

NMR-Data for oxohygroolidin in CD<sub>3</sub>OD (600/150MHz, CD<sub>3</sub>OD, 25°C)

| Pos | $\delta_C$ | $\delta_H$ (J/Hz)                                  | COSY <sup>a</sup>                                                                         | HMBC <sup>a</sup>                                                              |
|-----|------------|----------------------------------------------------|-------------------------------------------------------------------------------------------|--------------------------------------------------------------------------------|
| 1   | 172.4      |                                                    |                                                                                           | 3-H, 15-H, 26-H <sub>3</sub>                                                   |
| 2   | 123.1      |                                                    |                                                                                           | 3-H, 26-H <sub>3</sub> , (27-H <sub>3</sub> )                                  |
| 3   | 147.8      | 7.25 s                                             | 5-H, 26-H <sub>3</sub>                                                                    | 5-H, 26-H <sub>3</sub> , 27-H <sub>3</sub>                                     |
| 4   | 134.5      |                                                    |                                                                                           | 3-H, (5-H), (7-H), 6-H, 26-H <sub>3</sub> , 27-H <sub>3</sub>                  |
| 5   | 146.7      | 5.95 d (8.8)                                       | 3-H, 6-H, 27-H <sub>3</sub>                                                               | 3-H, 7-H, 6-H, (26-H <sub>3</sub> ), 27-H <sub>3</sub> , 28-H <sub>3</sub>     |
| 6   | 38.7       | 2.54 ddq (8.8, 1.8, 7.2)                           | 5-H, 7-H, 28-H <sub>3</sub>                                                               | 7-H, 8-H, 28-H <sub>3</sub>                                                    |
| 7   | 81.3       | 3.26 dd (6.4, 2.0)                                 | 6-H, 8-H                                                                                  | 5-H, 8-H, 9-H <sub>2</sub> , 28-H <sub>3</sub> , 29-H <sub>3</sub>             |
| 8   | 41.1       | 1.87 m                                             | 7-H, 9-H <sub>2</sub> , 29-H <sub>3</sub>                                                 | 7-H, 9-H <sub>2</sub> , 29-H <sub>3</sub>                                      |
| 9   | 42.6       | 2.02                                               | 11-H, 30-H <sub>3</sub>                                                                   | 11-H, 29-H <sub>3</sub> , 30-H <sub>3</sub>                                    |
| 10  | 144.3      |                                                    |                                                                                           | 9-H <sub>2</sub> , (11-H), 12-H, (13-H), 29-H <sub>3</sub> , 30-H <sub>3</sub> |
| 11  | 125.4      | 5.76 d (10.8)                                      | 12-H, 30-H <sub>3</sub>                                                                   | 9-H <sub>2</sub> , 12-H, 13-H, 30-H <sub>3</sub>                               |
| 12  | 134.1      | 6.55 dd (15.2, 10.8)                               | 11-H, 13-H                                                                                | 11-H, 14-H, 30-H <sub>3</sub>                                                  |
| 13  | 126.8      | 5.13 dd (14.8, 8.4)                                | 12-H                                                                                      | 11-H, (12-H), 13-H, 14-H, 30-H <sub>3</sub>                                    |
| 14  | 85.4       | 3.93 dd (8.4, 7.2)                                 | 15-H                                                                                      | 9-H <sub>2</sub> , 12-H, 13-H, 34-H <sub>3</sub>                               |
| 15  | 76.86      | 5.11 dd (6.8, 2.0)                                 | 14-H, (16-H)                                                                              | 13-H, 14-H, 17-H, 31-H <sub>3</sub>                                            |
| 16  | 40.6       | 2.00                                               | (15-H), 17-H, 31-H <sub>3</sub>                                                           | 14-H, 15-H, (17-H), 31-H <sub>3</sub>                                          |
| 17  | 73.8       | 3.75 dd (8.8, 4.0)                                 | 16-H, 18-H                                                                                | 15-H, 16-H, 18-H, 31-H <sub>3</sub> , 32-H <sub>3</sub>                        |
| 18  | 47.6       | 3.06 dq (4.0, 6.8)                                 | 17-H, 32-H <sub>3</sub>                                                                   | 16-H, (17-H), 32-H <sub>3</sub>                                                |
| 19  | 205.0      |                                                    |                                                                                           | 17-H, 18-H, 20-H, 21-H, 32-H <sub>3</sub>                                      |
| 20  | 129.5      | 6.24 dd (14.9, 0.8)                                | 21-H, (22-H)                                                                              | (21-H), 22-H                                                                   |
| 21  | 151.3      | 6.82 dd (15.7, 8.0)                                | 20-H, 22-H                                                                                | 20-H, 23-H, 22-H, 33-H <sub>3</sub>                                            |
| 22  | 44.2       | 2.38 m                                             | 21-H, (23-H), 33-H <sub>3</sub>                                                           | 20-H, 21-H, 24-H <sub>b</sub> , 33-H <sub>3</sub>                              |
| 23  | 76.89      | 3.37 ddd (9.2, 6.0, 3.6)                           | 22-H, 24-H <sub>b</sub>                                                                   | (20-H), 21-H, 22-H, 24-H <sub>b</sub> , 25-H <sub>3</sub> , 33-H <sub>3</sub>  |
| 24  | 28.6       | H <sub>a</sub> : 1.50 m<br>H <sub>b</sub> : 1.32 m | 22-H, 14-H <sub>b</sub> , 25-H <sub>3</sub> , 22-H, 14-H <sub>a</sub> , 25-H <sub>3</sub> | 22-H, 25-H <sub>3</sub>                                                        |
| 25  | 10.7       | 0.93 t (7.2)                                       | 24-H <sub>a</sub> , 24-H <sub>b</sub>                                                     | (23-H), 24-H <sub>b</sub>                                                      |
| 26  | 14.1       | 2.03 s                                             | 3-H                                                                                       | 3-H, <sup>1</sup> J                                                            |
| 27  | 15.4       | 1.96 d (0.8)                                       | 5-H                                                                                       | 3-H, 5-H, <sup>1</sup> J                                                       |
| 28  | 18.3       | 1.06 d (7.2)                                       | 6-H                                                                                       | 6-H, 7-H, 27-H <sub>3</sub> , <sup>1</sup> J                                   |
| 29  | 22.5       | 0.92 d (6.4)                                       | 8-H                                                                                       | 7-H, 8-H, 9-H <sub>2</sub>                                                     |
| 30  | 19.8       | 1.85 s                                             | 9-H <sub>2</sub> , 11-H                                                                   | 9-H <sub>2</sub> , 11-H                                                        |
| 31  | 11.3       | 0.97 d (6.8)                                       | 16-H                                                                                      | 15-H, 16-H, <sup>1</sup> J                                                     |
| 32  | 9.8        | 1.10 d (6.8)                                       | 18-H                                                                                      | 17-H, 18-H, <sup>1</sup> J                                                     |
| 33  | 15.4       | 1.08 d (6.8)                                       | 22-H                                                                                      | 21-H, 22-H, <sup>1</sup> J                                                     |
| 34  | 56.0       | 3.22 s                                             |                                                                                           | 14-H, <sup>1</sup> J                                                           |

<sup>a</sup>Weak signals in brackets

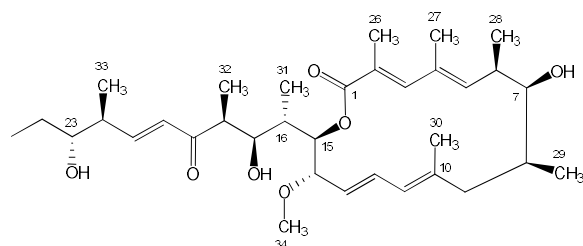

Calc [M+Na]<sup>+</sup>: 597.3762; found 597.3754

Oxohygroolidin was firstly identified by Kretschmer et al.<sup>12</sup>

# HRMS analysis (positive mode) of oxohydroindin.

3 2 #1344 RT: 15.04 AV: 1 NL: 7.11E6  
T: FTMS + c ESI Full ms [200.00-2000.00]

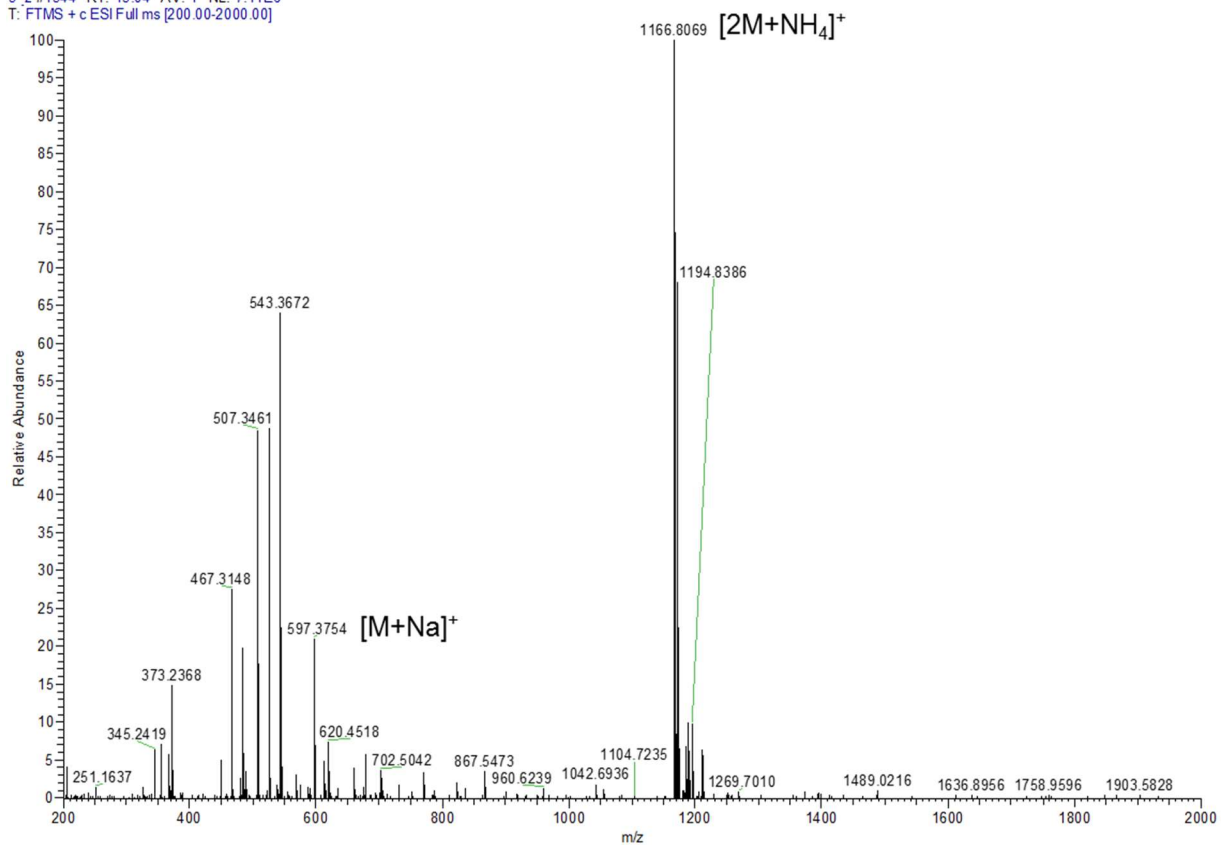

**$^1\text{H}$  NMR spectrum of oxohygroldin (600 MHz,  $\text{CD}_3\text{OD}$ , 25 °C).**

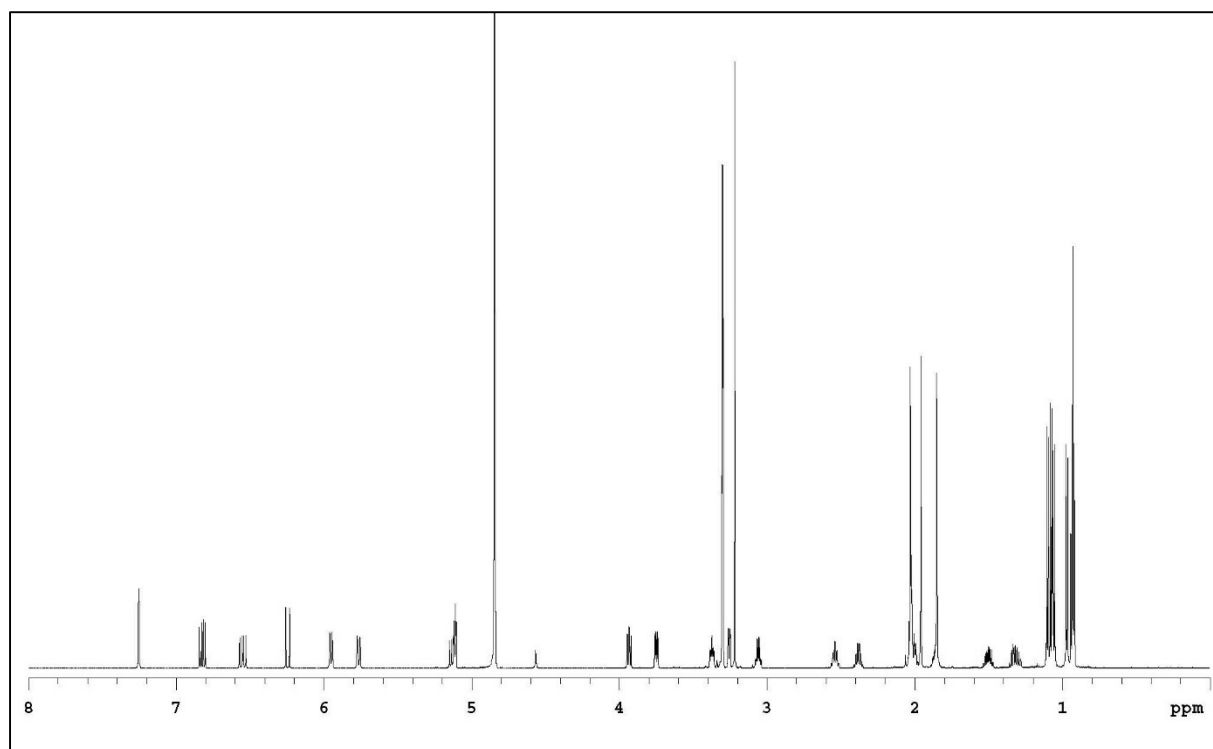

**$^{13}\text{C}$  NMR spectrum of oxohygroldin (150 MHz,  $\text{CD}_3\text{OD}$ , 25 °C).**

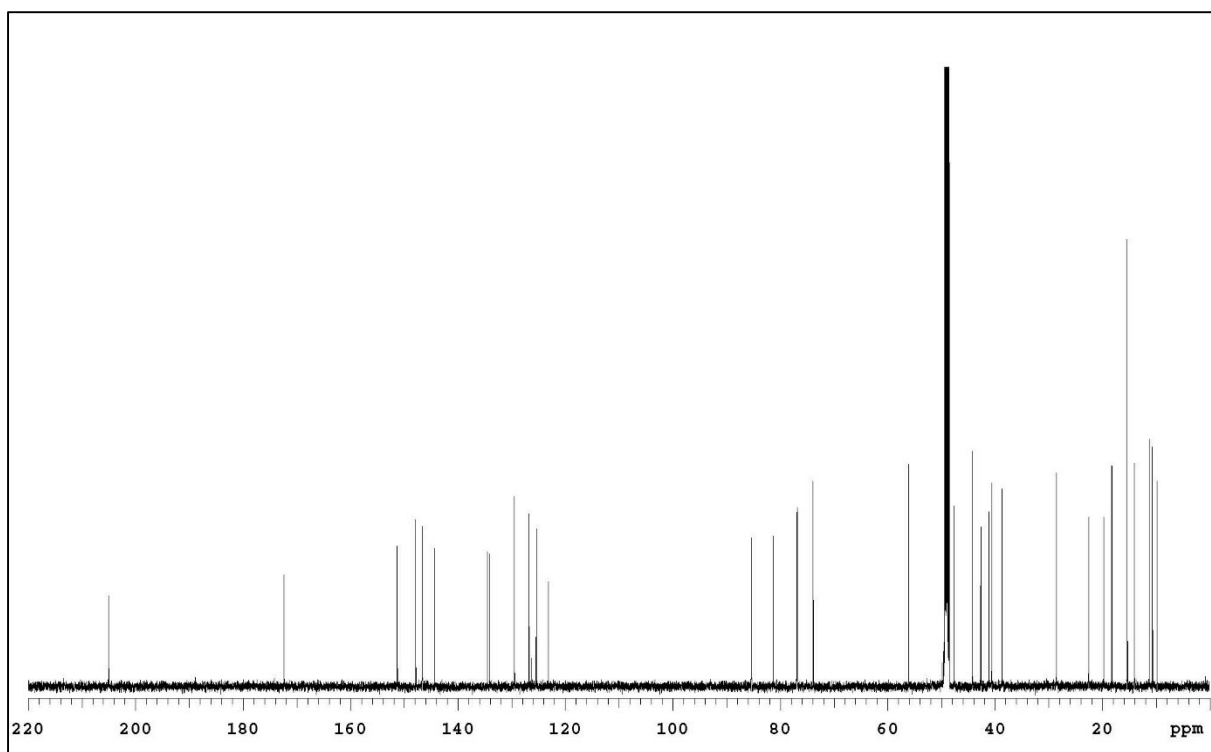



**DEPT spectrum of oxohygroldin (150 MHz, CD<sub>3</sub>OD, 25 °C).**

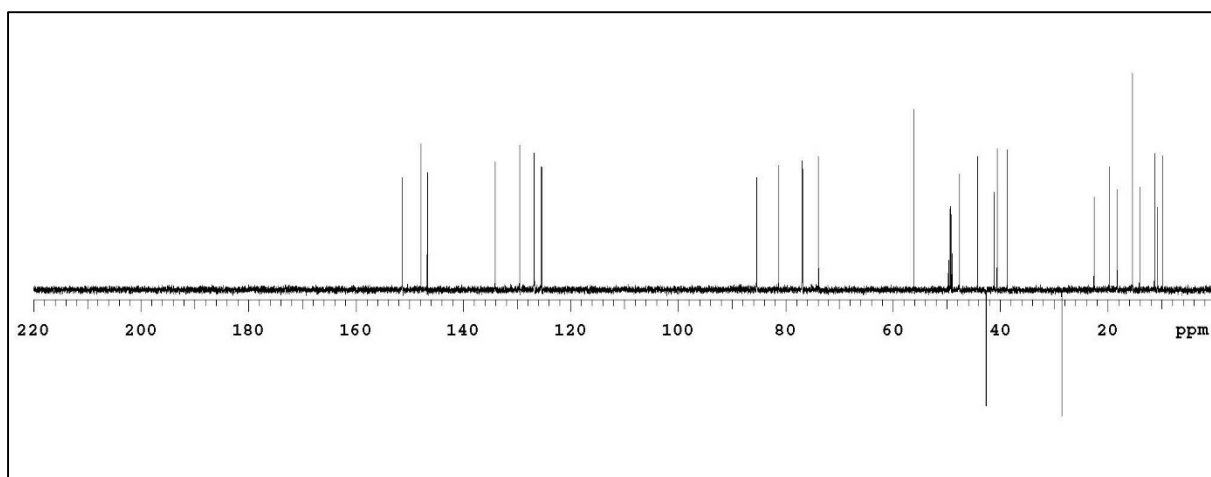

**COSY spectrum of oxohydroolidin (600 MHz, CD<sub>3</sub>OD, 25 °C).**

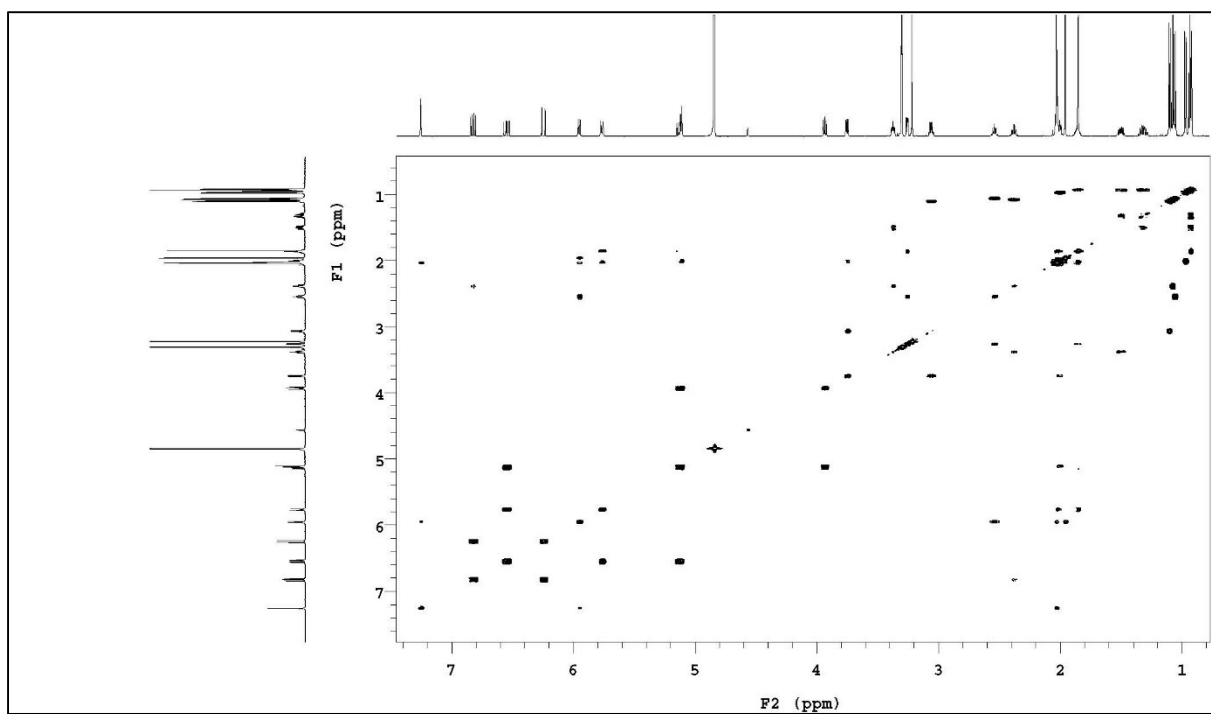

HSQC spectrum of oxohydroolidin (600 MHz, CD<sub>3</sub>OD, 25 °C).

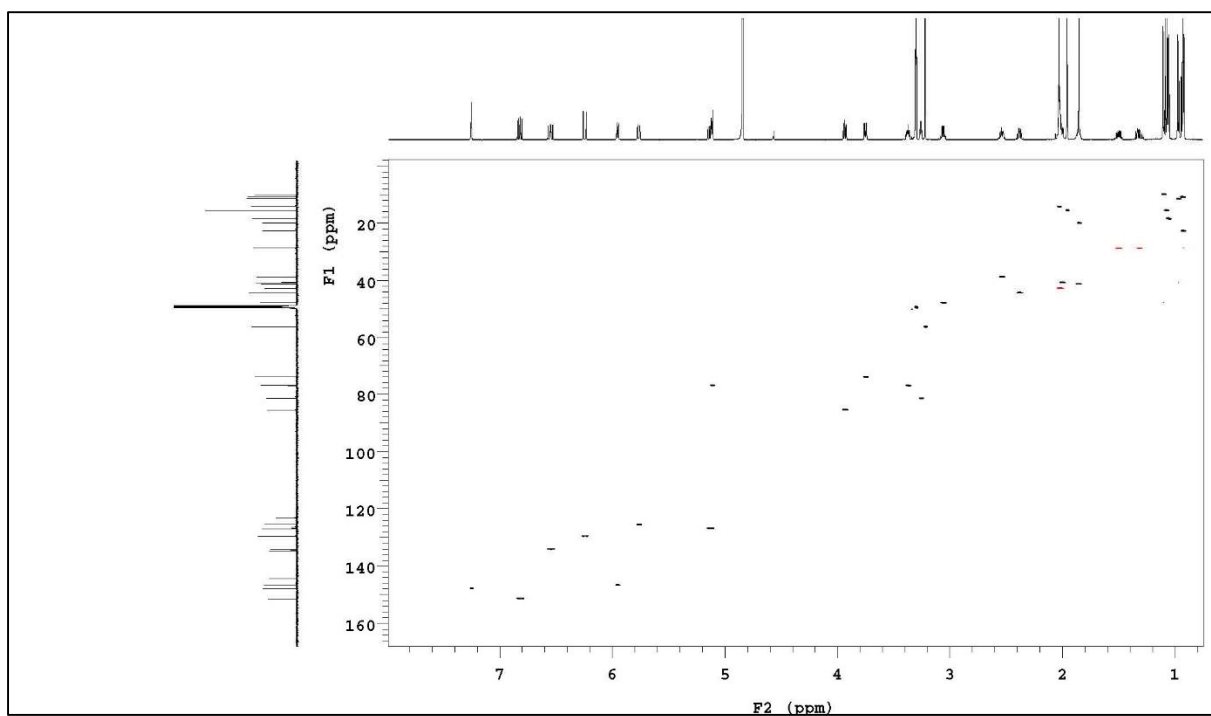

**HMBC spectrum of oxohydrolydin (600 MHz, CD<sub>3</sub>OD, 25 °C).**

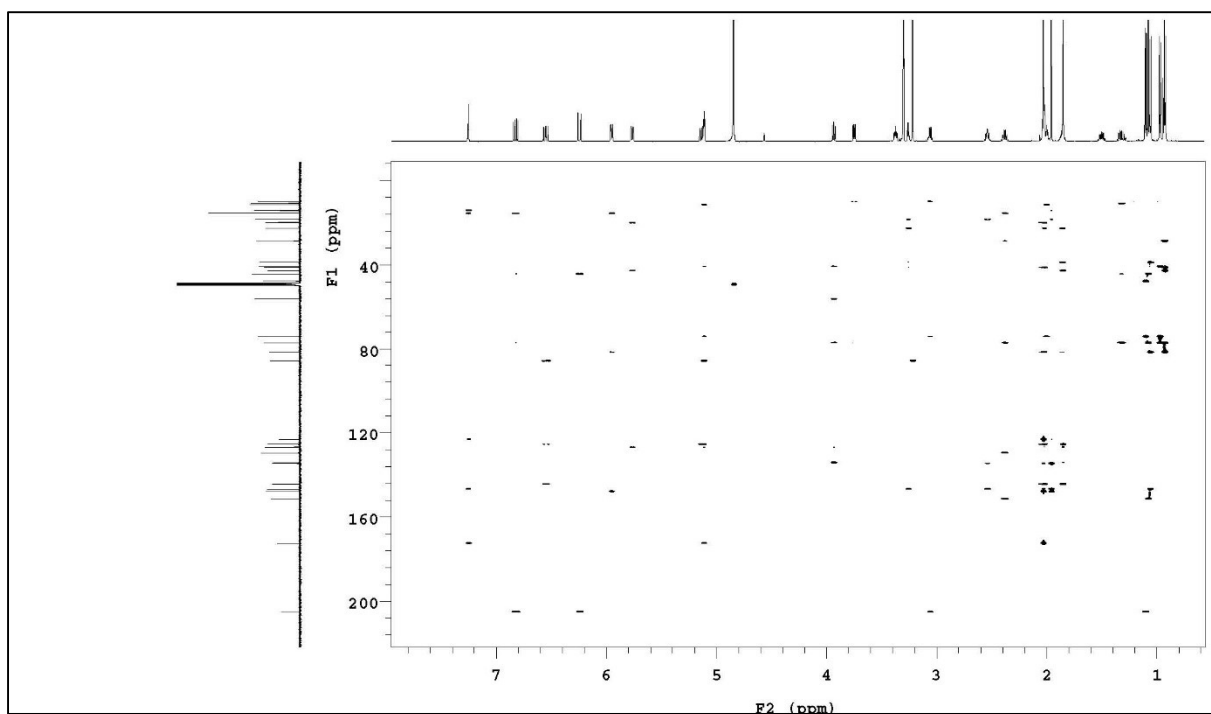

## References

1. Gust, B. et al.  $\lambda$  Red-mediated genetic manipulation of antibiotic-producing *Streptomyces*. *Adv. Appl. Microbiol.* **54**, 107–128 (2004).
2. Makitrynskyi, R. et al. Pleiotropic regulatory genes *bldA*, *adpA* and *absB* are implicated in production of phosphoglycolipid antibiotic moenomycin. *Open Biol.* **3**, 130121 (2013).
3. Chater, K., F. & Wilde, L. C. *Streptomyces albus* G mutants defective in the *SalGI* restriction-modification system. *J. Gen. Microbiol.* **116**, 323–334 (1980).
4. Myronovskyi, M., Welle, E., Fedorenko, V. & Luzhetskyy, A. Beta-glucuronidase as a sensitive and versatile reporter in actinomycetes. *Appl. Environ. Microbiol.* **77**, 5370–5383 (2011).
5. Fedoryshyn, M., Welle, E., Bechthold, A. & Luzhetskyy, A. Functional expression of the Cre recombinase in actinomycetes. *Appl. Microbiol. Biotechnol.* **78**, 1065–1070 (2008).
6. Bierman, M., Logan, R., O'Brien, K., Seno, E. T., Rao, R. N. & Schonher, B. E. Plasmid cloning vectors for the conjugal transfer of DNA from *Escherichia coli* to *Streptomyces* spp. *Gene* **116**, 43–49 (1992).
7. Muth, G., Nussbaumer, B., Wohlleben, W. & Pühler, A. A vector system with temperature-sensitive replication for gene disruption and mutational cloning in streptomycetes. *Mol. Gen. Genet.* **6**, 1–8 (1989).
8. Herrmann, S. et al. Site-specific recombination strategies for engineering actinomycete genomes. *Appl. Environ. Microbiol.* **78**, 1804–1812 (2012).
9. Hong, H. J., Hutchings, M. I., Hill, L. M. & Buttner, M. J. The role of the novel Fem protein VanK in vancomycin resistance in *Streptomyces coelicolor*. *J. Biol. Chem.* **280**, 13055–13061 (2005).
10. Tran, N. T., Den Hengst, C. D., Gomez-Escribano, J. P. & Buttner, M. J. Identification and characterization of CdgB, a diguanylate cyclase involved in developmental processes in *Streptomyces coelicolor*. *J. Bacteriol.* **193**, 3100–3108 (2011).
11. Sehin, Y. et al. Gene *ssfg\_01967* (*miaB*) for tRNA modification influences morphogenesis and moenomycin biosynthesis in *Streptomyces ghanaensis* ATCC14672. *Microbiology* **165**, 233–245 (2019).
12. Kretschmer, A., Dorgerloh, M., Deeg, M. & Hagenmaier, H. The structures of novel insecticidal macrolides: bafilomycins D and E, and oxohygroolidin. *Agric. Biol. Chem.* **49**, 2509–2511 (1985).
